# Supplementary material for: The mycotoxin viriditoxin induces leukemia- and lymphoma-specific apoptosis by targeting mitochondrial metabolism
Source: PubMed Central journal article supplement (PMC9643474; doi:10.1038/s41419-022-05356-w), 2022-11-08

# Original Western Blots

(all western blots were scanned via LI-COR Odyssey® imaging system)

**Figure 2C**  
(Ramos)

**PARP**

**Tubulin**

| DMSO | VDT ( $\mu$ M) |   |    |   | STS | VDT ( $\mu$ M) |   |    |   | STS | QVD |
|------|----------------|---|----|---|-----|----------------|---|----|---|-----|-----|
|      | 1              | 3 | 10 |   |     | 1              | 3 | 10 |   |     |     |
| -    | -              | - | -  | - | -   | +              | + | +  | + | +   |     |

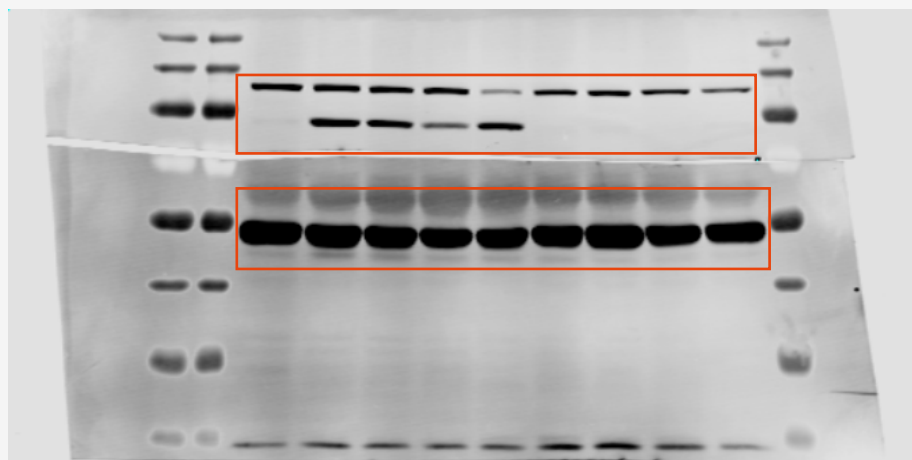

**Figure 2D**  
(Jurkat)

**PARP**

**Tubulin**

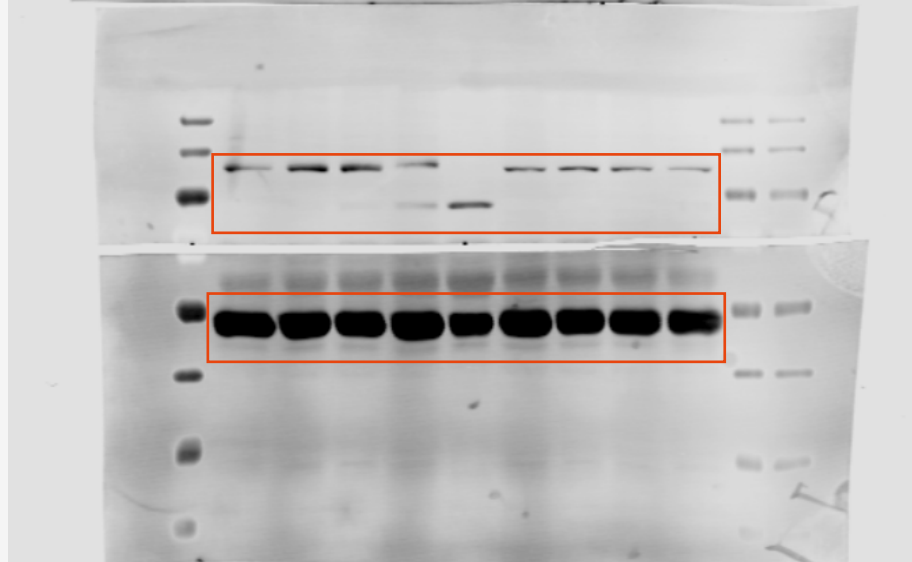

# Figure 4B

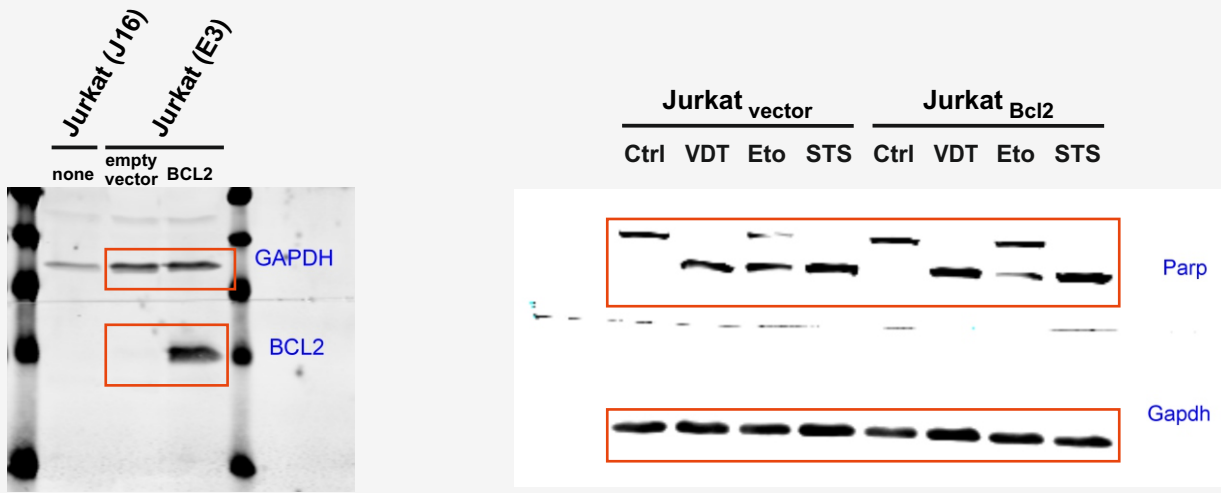

# Figure 4E

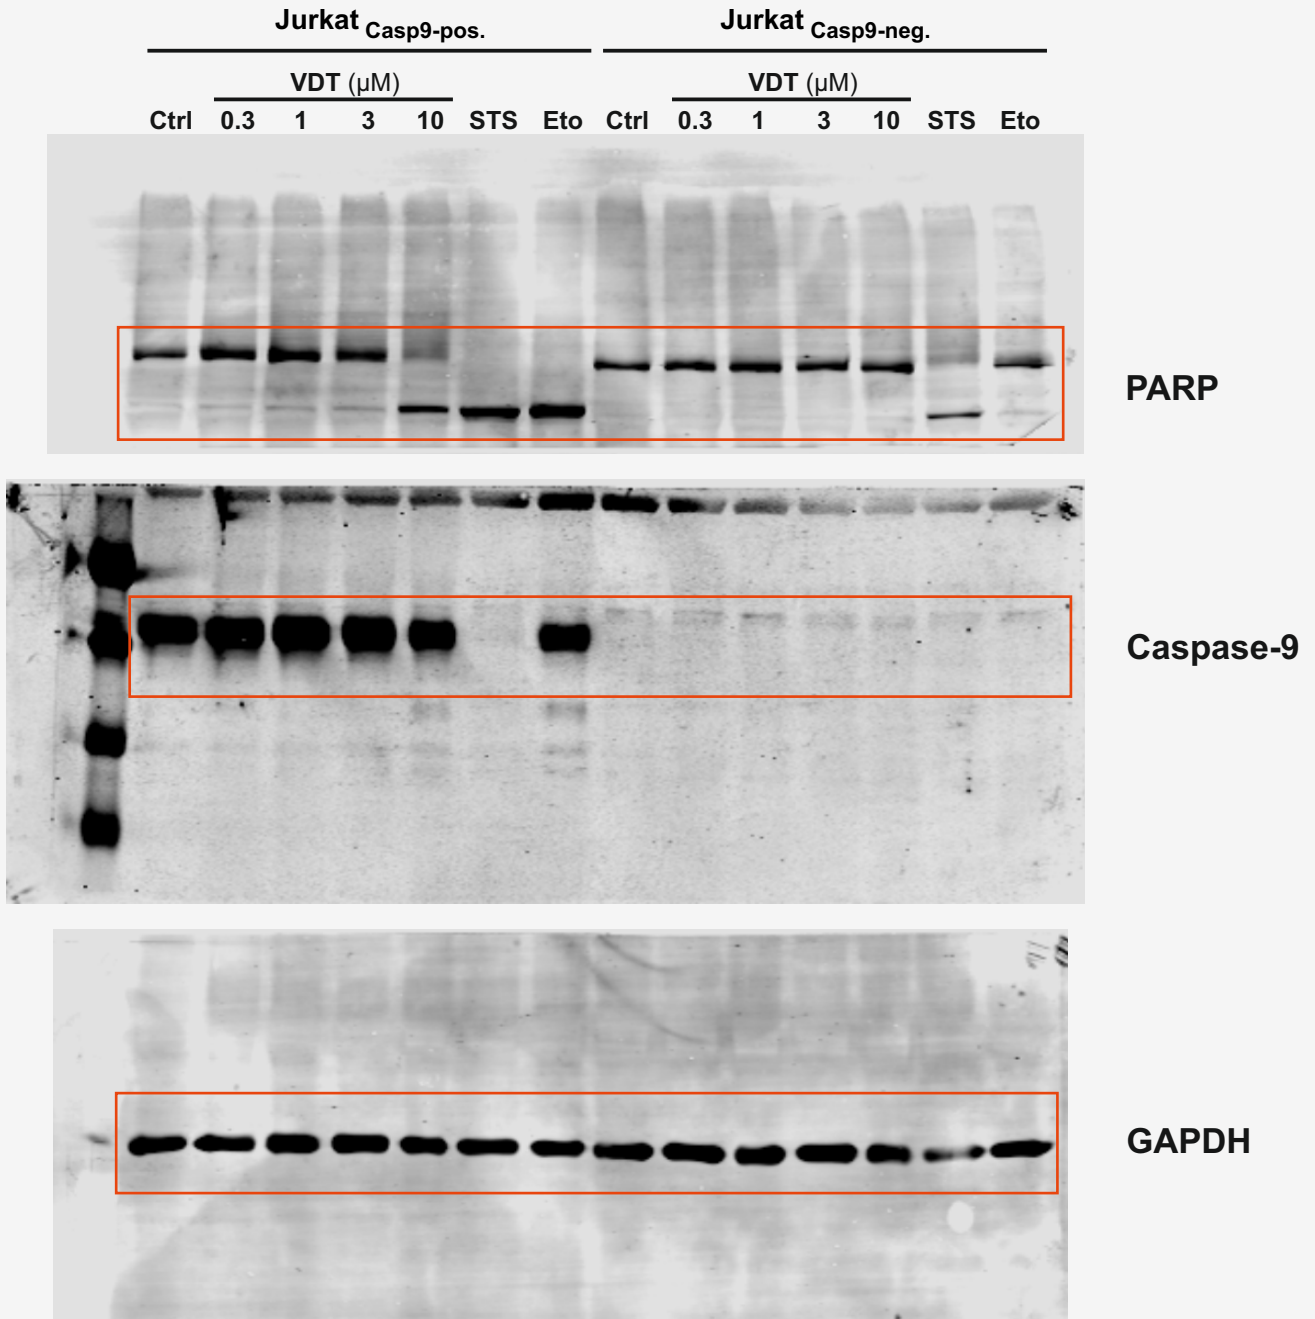

**Figure 4G**

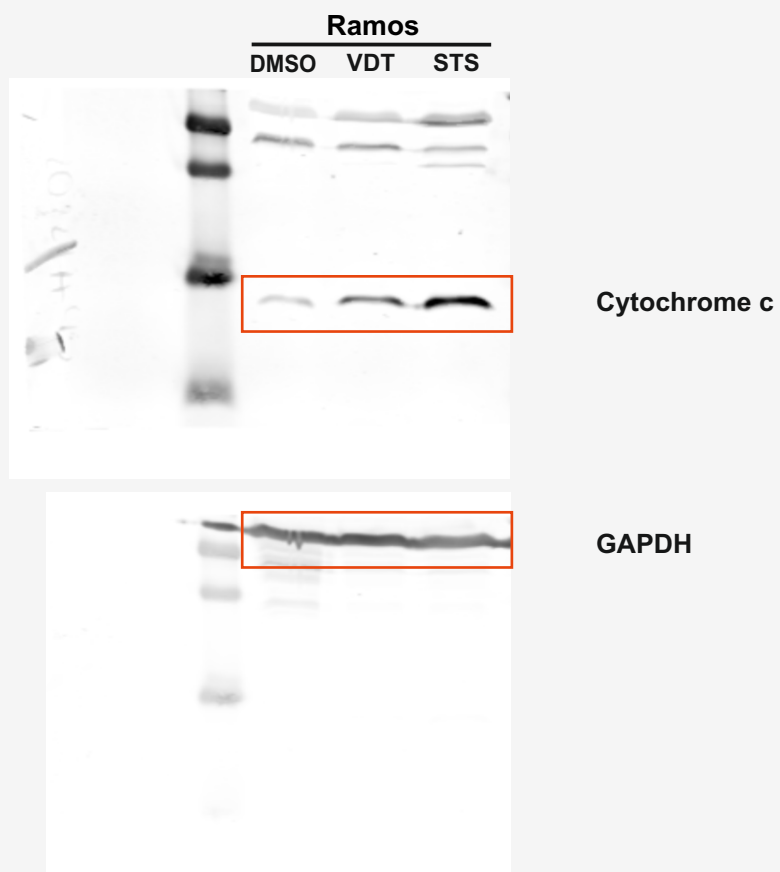

**Figure 5A**  
left panel)

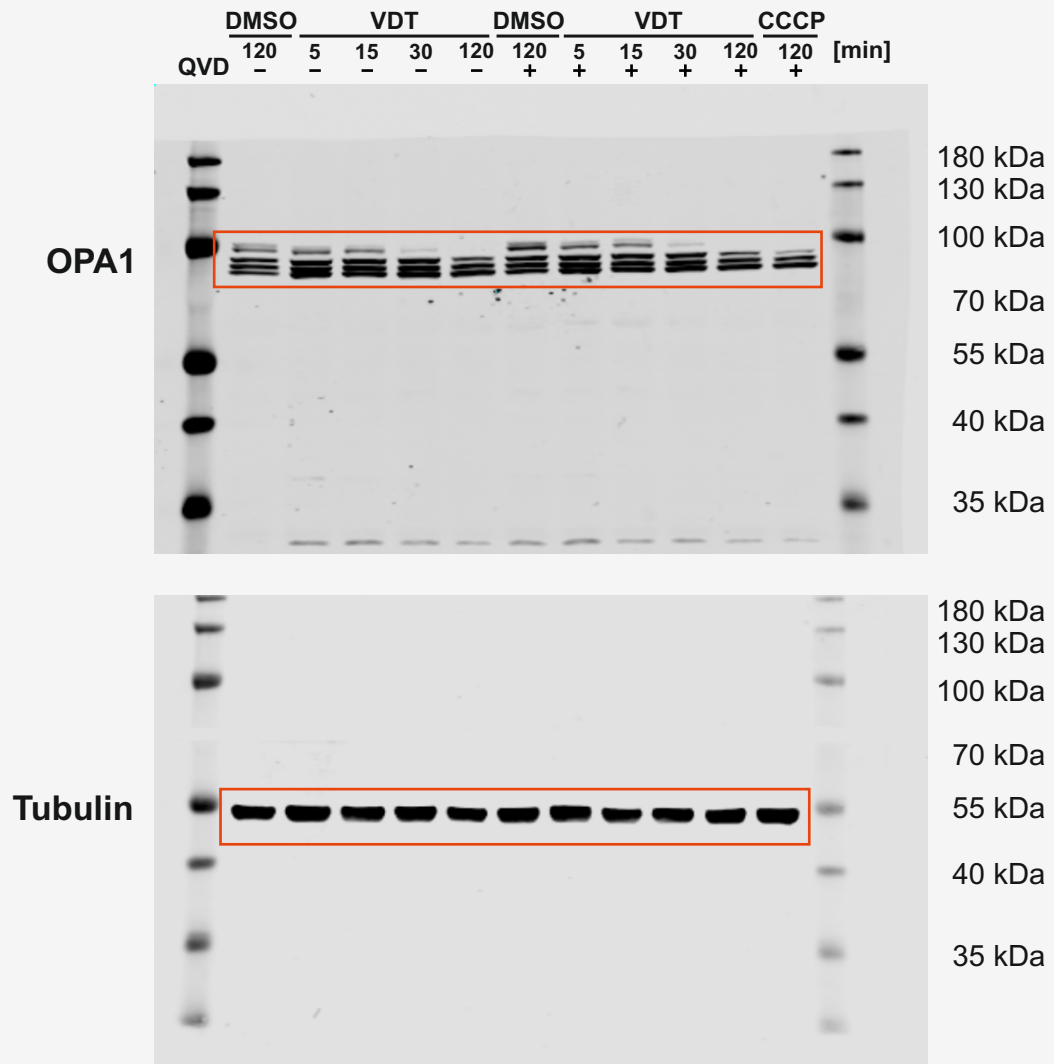

**Figure 5A**  
right panel)

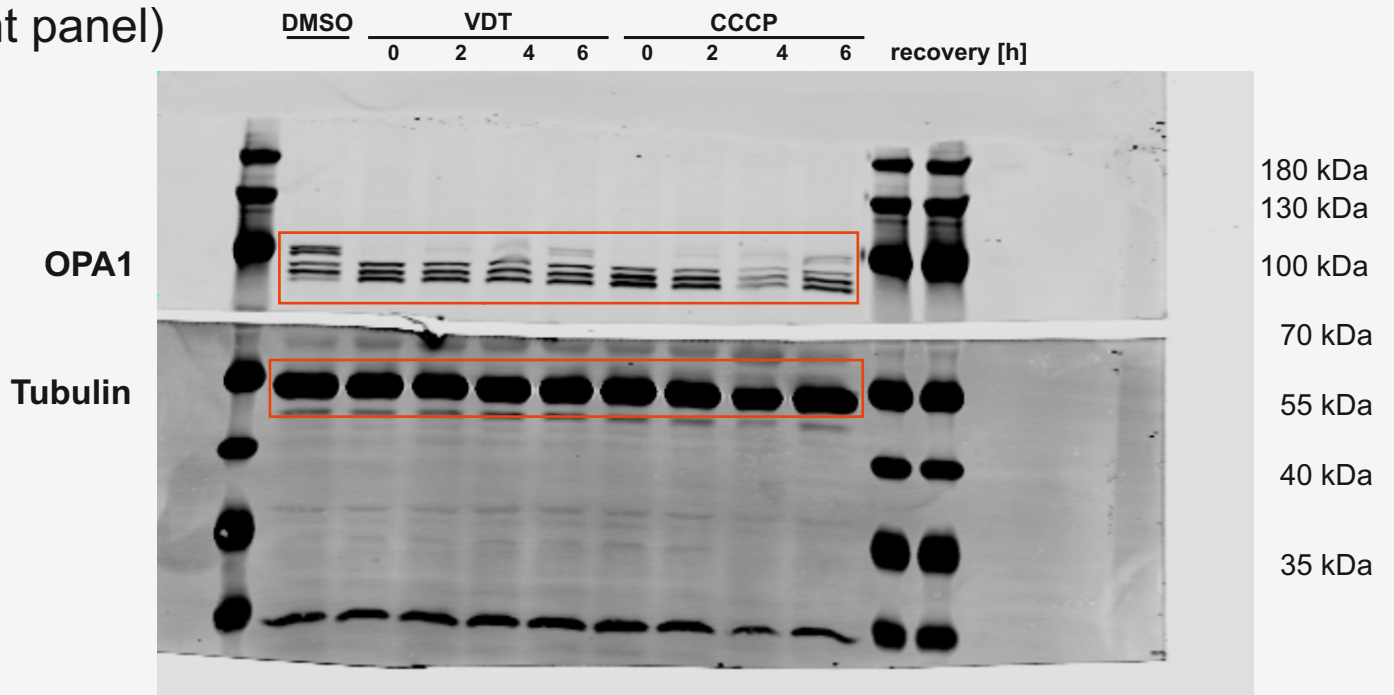

**Figure 5F**

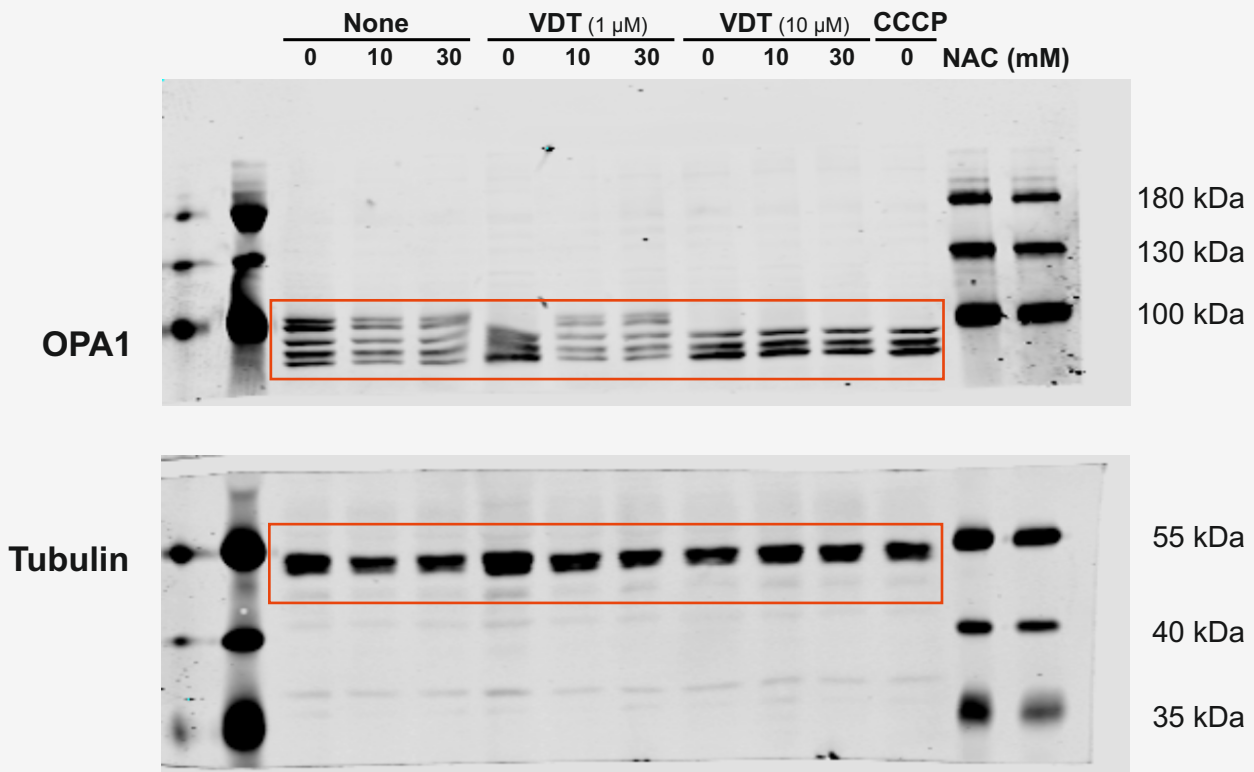

**Figure 6D**

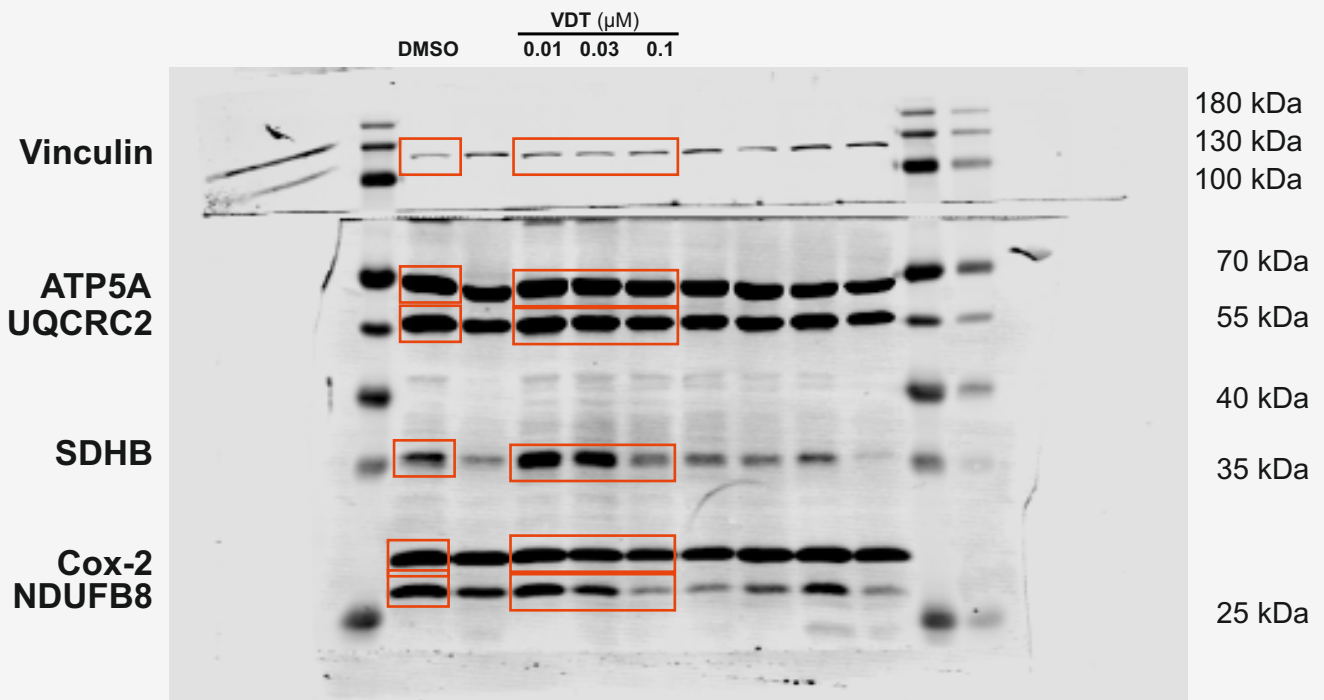



## Suppl. Figure 2C

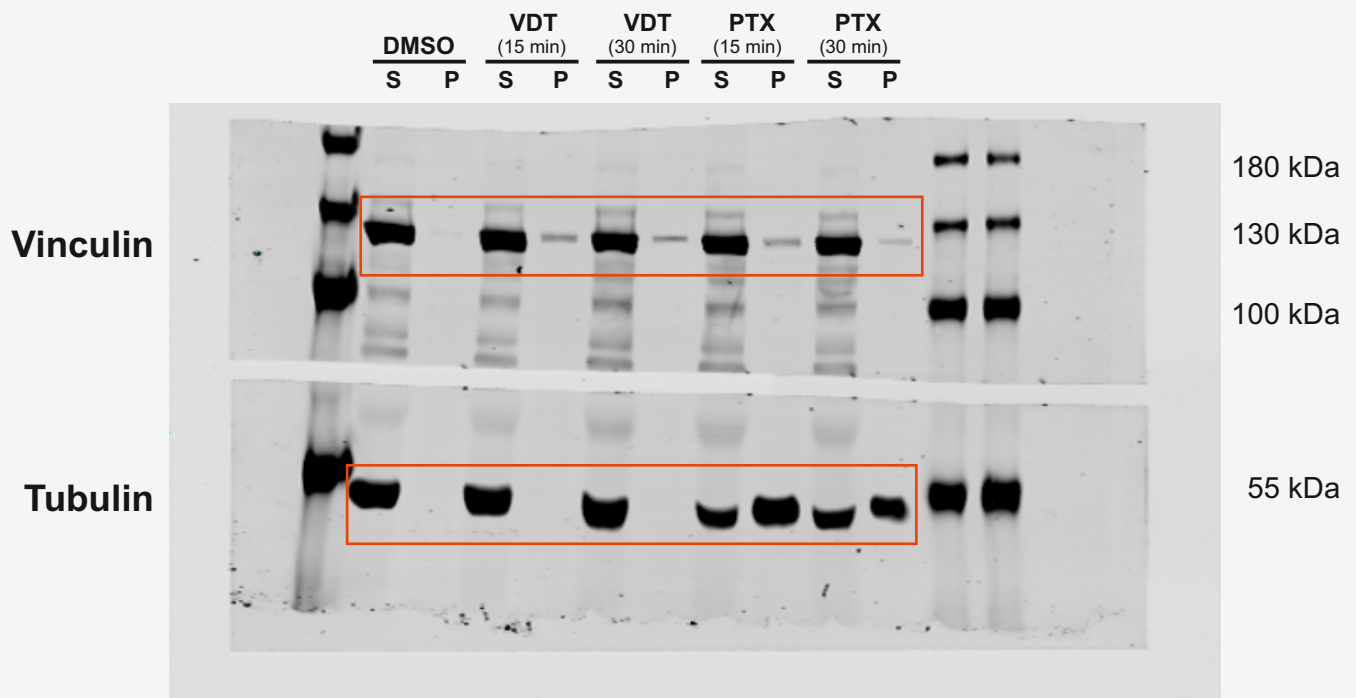

## Suppl. Figure 3B

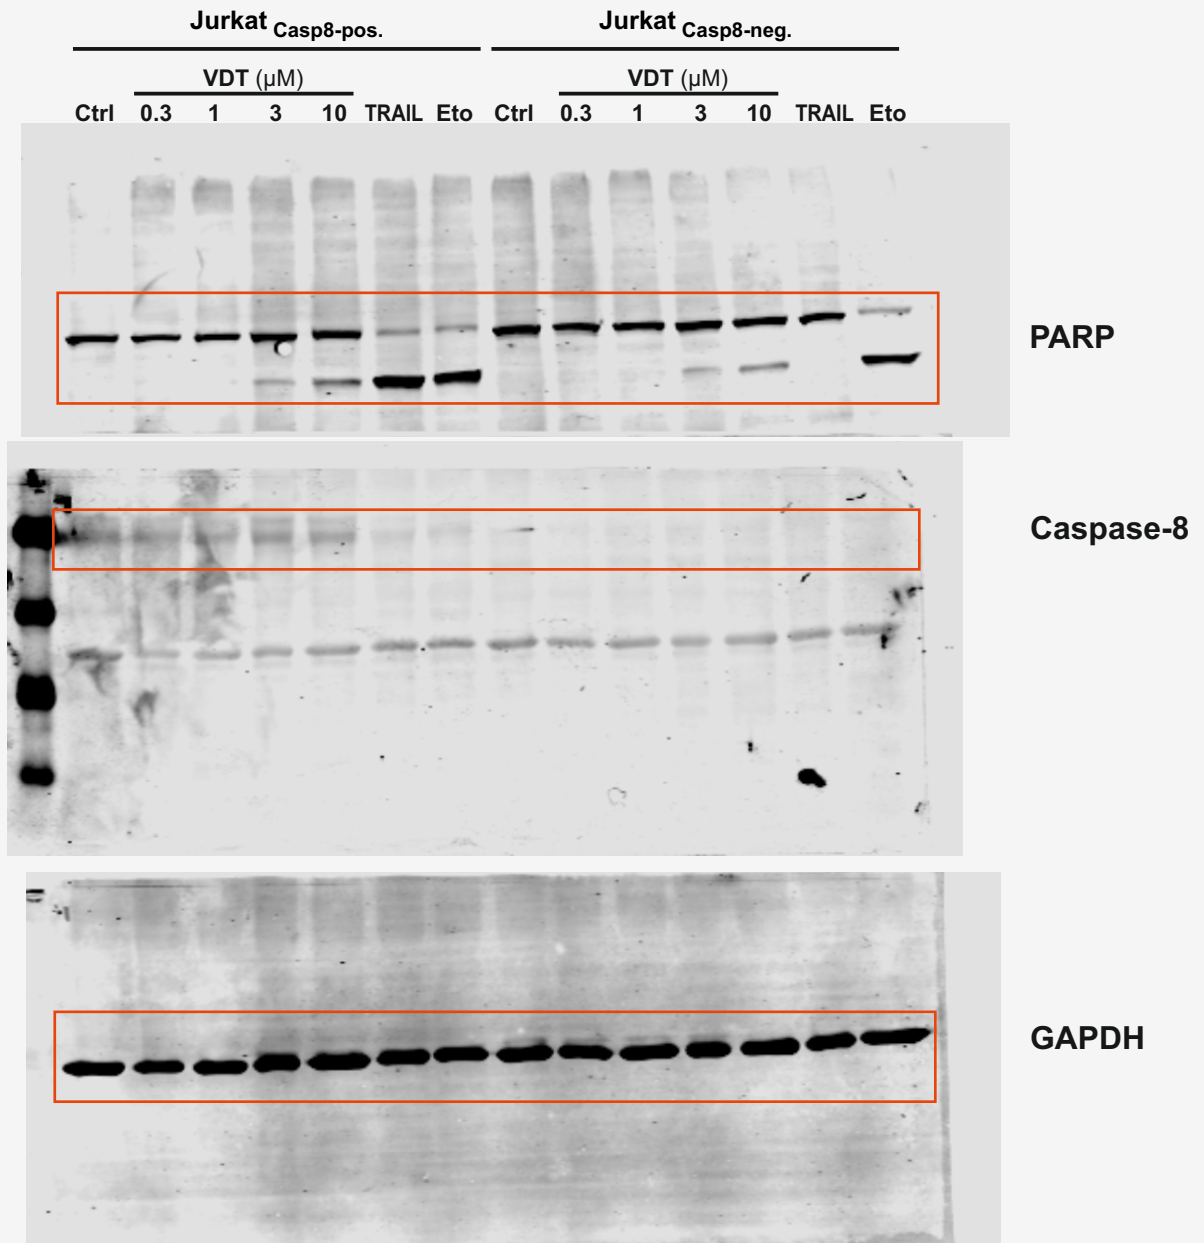

Supplement: 41419_2022_5356_MOESM2_ESM.pdf [file 41419_2022_5356_MOESM2_ESM.pdf]
