# Supplementary material for: The mycotoxin viriditoxin induces leukemia- and lymphoma-specific apoptosis by targeting mitochondrial metabolism
Source: PubMed Central journal article supplement (PMC9643474; doi:10.1038/s41419-022-05356-w), 2022-11-08
Supplement: 41419_2022_5356_MOESM3_ESM.pdf [file 41419_2022_5356_MOESM3_ESM.pdf]

## **Agreement from all authors concerning altered author list (CDDIS-22-1280RR)**

*Listed in order of the author list in the manuscript*

### **Fabian Stuhldreier**

Von: Fabian Stuhldreier <fabianstuhldreier@gmail.com>  
Betreff: Aw: Fwd: CDDIS-22-1280RR Initial Quality Check  
Datum: 8. Oktober 2022 um 00:23:35 MESZ  
An: Sebastian Wesselborg <sebastian.wesselborg@uni-duesseldorf.de>

Dear Sebastian,

I fully agree with the modified list of authors.

With kind regards Fabian Stuhldreier

Am 06.10.2022 um 11:07 schrieb Sebastian Wesselborg:

Dear colleagues,  
Cell Death & Disease has noted that the author list from our first submission differs from the resubmission since we included additional authors (no deletions) due to their valuable contributions for the rebuttal. The following authors were added: Sanil Bhatia, Julian Schliehe-Diecks, Bodo Levkau, Philipp Wollnitzke, Andreas Reichert, Marcel Zimmermann, and Nicole Teusch.

Therefore, I need the confirmation from all authors that you agree to these changes. **Please send me this confirmation per e-mail so I can upload it for Cell Death & Disease.**

With best regards  
Sebastian

\*\*\*\*\*

Prof. Sebastian Wesselborg, PhD  
Director, Institute for Molecular Medicine I  
School of Medicine  
University of Duesseldorf  
Universitätsstr. 1; Bld. 22.03  
D-40225 Duesseldorf  
GERMANY  
Tel: +49-(0)211-81 12722  
+49-(0)172-1079 468

[E-Mail: sebastian.wesselborg@uni-duesseldorf.de](mailto:sebastian.wesselborg@uni-duesseldorf.de)

<https://www.uniklinik-duesseldorf.de/patienten-besucher/klinikeninstitutezentren/institut-fuer-molekulare-medizin-i>

**Laura Schmitt**

Von: <Laura.Schmitt@med.uni-duesseldorf.de>  
Betreff: AW: CDDIS-22-1280RR Initial Quality Check  
Datum: 6. Oktober 2022 um 11:14:32 MESZ  
An: <sebastian.wesselborg@uni-duesseldorf.de>

I agree to these changes.  
Best

Laura Schmitt  
Doktorandin, Institut für Molekulare Medizin I

**Universitätsklinikum Düsseldorf**  
Gebäude 22.03, Ebene 01, Raum 26  
Universitätsstraße 1  
40225 Düsseldorf

Mail: [laura.schmitt@med.uni-duesseldorf.de](mailto:laura.schmitt@med.uni-duesseldorf.de)  
Tel: +49 211 81-13554

**Thomas Lenz**

Von: "Thomas Lenz" <thomas.lenz@hhu.de>

Betreff: AW: CDDIS-22-1280RR Initial Quality Check

Datum: 6. Oktober 2022 um 11:12:06 MESZ

An: "Sebastian Wesselborg" <sebastian.wesselborg@uni-duesseldorf.de>

Dear Sebastian,

I agree to the changes.

Best,

Thomas

**Ilka Hinxlage**

Von: "Ilka Hinxlage" <Ilka.Hinxlage@hhu.de>  
Betreff: AW: URGENT !!! Wtr: CDDIS-22-1280RR Initial Quality Check  
Datum: 10. Oktober 2022 um 09:21:44 MESZ  
An: "Sebastian Wesselborg" <sebastian.wesselborg@uni-duesseldorf.de>

Guten Morgen Sebastian,

hier von mir auch das statement:

Herewith, I confirm that I fully comply with the changes concerning the final author list.

Dir einen guten Start in die Woche!

Ilka

--

**Ilka Hinxlage**

Doktorandin, Institut für Molekulare Medizin I

**Universitätsklinikum Düsseldorf**

Gebäude 22.03, Ebene 01, Raum 26  
40225 Düsseldorf

Tel: +49 211 81-13554

e-Mail: [ilka.hinxlage@hhu.de](mailto:ilka.hinxlage@hhu.de)

**Marcel Zimmermann**

Von: "Zimmermann, Marcel" <Marcel.Zimmermann.2@uni-duesseldorf.de>  
Betreff: AW: URGENT !!! Wtr: CDDIS-22-1280RR Initial Quality Check  
Datum: 14. Oktober 2022 um 10:25:38 MESZ  
An: Sebastian Wesselborg <sebastian.wesselborg@uni-duesseldorf.de>

Dear Sebastian,

I hereby fully agree to the final author list and order and all changes that have been made.

Please forward this email to the Journal.

Sincerely

Marcel Zimmermann

**Philipp Wollnitzke**

Von: <Philipp.Wollnitzke@med.uni-duesseldorf.de>

Betreff: AW: URGENT !!! Wtr: CDDIS-22-1280RR Initial Quality Check

Datum: 10. Oktober 2022 um 07:33:34 MESZ

An: <sebastian.wesselborg@uni-duesseldorf.de>

Dear Sebastian,

thank you for considering me as co-author. Herewith, I confirm that I fully comply with the changes concerning the final author list.

Best regards,

Philipp

**Julian Schliehe-Diecks**

Von: <Julian.Schliehe-Diecks@med.uni-duesseldorf.de>  
Betreff: AW: CDDIS-22-1280RR Initial Quality Check  
Datum: 6. Oktober 2022 um 11:11:24 MESZ  
An: <sebastian.wesselborg@uni-duesseldorf.de>

Dear Prof. Wesselborg,

I agree with the author changes.

BR,

Julian Schliehe-Diecks

**Yang Liu**

Von: 刘洋 <liuyangthink@163.com>

Betreff: Re:URGENT !!! Wtr: CDDIS-22-1280RR Initial Quality Check

Datum: 12. Oktober 2022 um 15:54:09 MESZ

An: "Sebastian Wesselborg" <sebastian.wesselborg@uni-duesseldorf.de>

Dear Prof. Wesselborg,

really sorry to reply to your email so late. I agree with the changes with the addition of other authors!

Best regards!

Yang Liu

**Paul Jäger**

on: <PaulSebastian.Jaeger@med.uni-duesseldorf.de>

Betreff: AW: URGENT !!! Wtr: CDDIS-22-1280RR Initial Quality Check

Datum: 9. Oktober 2022 um 20:05:15 MESZ

An: <sebastian.wesselborg@uni-duesseldorf.de>

Dear Sebastian,

thank you very much.

**Herewith, I confirm that I fully comply with the changes made concerning the final author list.**

With kind regards  
Paul Jäger

**Stefanie Geyh**

Von: <Stefanie.Geyh@med.uni-duesseldorf.de>  
Betreff: AW: URGENT !!! Wtr: CDDIS-22-1280RR Initial Quality Check  
Datum: 9. Oktober 2022 um 21:29:51 MESZ  
An: <sebastian.wesselborg@uni-duesseldorf.de>

Dear Sebastian,

I apologize for the delayed reply, I just got back from an outside conference. Thanks for your efforts regarding the manuscript.

**Herewith, I confirm that I fully comply with the changes concerning the final author list.**

**Kind regards,  
Stefanie Geyh**

Dr. rer. nat. Stefanie Geyh  
Klinik f. Hämatologie, Onkologie u. Klinische Immunologie  
Hämatologisches Forschungslabor  
Universitätsklinikum Düsseldorf  
Moorenstr. 5  
Geb. 14.83.01.07  
40225 Düsseldorf  
Tel: +49-211-81-19606  
Fax: +49-211-81-04296

**Nicole Teusch**

Von: "Prof. Dr. Nicole Teusch" <Nicole.Teusch@hhu.de>

Betreff: Aw: URGENT !!! Wtr: CDDIS-22-1280RR Initial Quality Check

Datum: 9. Oktober 2022 um 11:18:34 MESZ

An: Sebastian Wesselborg <sebastian.wesselborg@uni-duesseldorf.de>

Dear Sebastian,

I agree with and confirm my authorship in the mentioned manuscript.  
Thank you for your consideration.

Kind regards  
Nicole

**Christoph Peter**

Von: "Christoph Peter" <[christoph.peter@uni-duesseldorf.de](mailto:christoph.peter@uni-duesseldorf.de)>

Betreff: AW: CDDIS-22-1280RR Initial Quality Check

Datum: 6. Oktober 2022 um 11:15:44 MESZ

An: "Sebastian Wesselborg" <[sebastian.wesselborg@uni-duesseldorf.de](mailto:sebastian.wesselborg@uni-duesseldorf.de)>

Dear Sebastian,

I hereby confirm that I agree with these changes.

Best

Christoph

Christoph Peter, Ph.D.  
Institute of Molecular Medicine  
University Hospital Düsseldorf  
Building 22.03  
Universitätsstraße 1  
40225 Düsseldorf  
Germany

Ph.: +49 (0) 211 81-12196

E-mail: [christoph.peter@uni-duesseldorf.de](mailto:christoph.peter@uni-duesseldorf.de)

**Sanil Bhatia**

Von: <Sanil.Bhatia@med.uni-duesseldorf.de>  
Betreff: AW: CDDIS-22-1280RR Initial Quality Check  
Datum: 6. Oktober 2022 um 11:56:57 MESZ  
An: <sebastian.wesselborg@uni-duesseldorf.de>

Dear Sebastian,

I confirm the changes in the authorship concerning the manuscript entitled 'The mycotoxin viriditoxin induces leukemia- and lymphoma-specific apoptosis by targeting mitochondrial metabolism: CDDIS-22-1280RR'.

Best regards,  
Sanil

## Rainer Haas

Von: <Haas@med.uni-duesseldorf.de>

Betreff: AW: CDDIS-22-1280RR Initial Quality Check

Datum: 7. Oktober 2022 um 14:13:14 MESZ

An: <sebastian.wesselborg@uni-duesseldorf.de>, <Fabian.Stuhldreier@uni-duesseldorf.de>, <fabianstuhldreier@gmail.com>, <fabianstuhldreier@googlemail.com>, <Laura.Schmitt@med.uni-duesseldorf.de>, <Ilka.Hinxlage@hhu.de>, <Thomas.Lenz@uni-duesseldorf.de>, <Marcel.Zimmermann.2@hhu.de>, <Philipp.Wollnitzke@med.uni-duesseldorf.de>, <Julian.Schliehe-Diecks@med.uni-duesseldorf.de>, <liuyangthink@163.com>, <PaulSebastian.Jaeger@med.uni-duesseldorf.de>, <Stefanie.Geyh@med.uni-duesseldorf.de>, <Nicole.Teusch@uni-duesseldorf.de>, <Christoph.Peter@uni-duesseldorf.de>, <Sanil.Bhatia@med.uni-duesseldorf.de>, <Bodo.Levkau@med.uni-duesseldorf.de>, <Reichert@hhu.de>, <Kai.Stuehler@uni-duesseldorf.de>, <Peter.Proksch@uni-duesseldorf.de>, <Bjoern.Stork@uni-duesseldorf.de>

Dear Sebastian,

thank you very much for all your al your work and efforts with regard to the publication of our paper!

**Herewith, I confirm that I fully comply with the changes made concerning the final author list.**

With kind regards Rainer Haas

**Bodo Levkau**

Von: <Bodo.Levkau@med.uni-duesseldorf.de>  
Betreff: AW: CDDIS-22-1280RR Initial Quality Check  
Datum: 9. Oktober 2022 um 10:35:39 MESZ  
An: <sebastian.wesselborg@uni-duesseldorf.de>

Dear Sebastian,  
Herewith, I confirm that I fully comply with the changes made concerning the final author list.  
Thank you  
Bodo Levkau

**Andreas Reichert**

Von: "Reichert, Andreas" <reichert@hhu.de>  
Betreff: AW: CDDIS-22-1280RR Initial Quality Check  
Datum: 6. Oktober 2022 um 11:39:27 MESZ  
An: Sebastian Wesselborg <sebastian.wesselborg@uni-duesseldorf.de>

Dear Sebastian,

I fully agree with these additions and the submission.

Best

Andreas

--

Prof. Dr. Andreas Reichert  
Director  
Institute of Biochemistry and Molecular Biology I  
University Hospital Düsseldorf  
Heinrich-Heine-University Düsseldorf  
Postal address:  
Postfach 101007  
40001 Düsseldorf

Local address:  
Universitätsstr. 1  
Gebäude 22.03/Ebene 04  
40225 Düsseldorf

Tel.: +4921181-12707 (Secretary)  
Tel.: +4921181-12717  
Fax.: +492118113029  
Email: [reichert@hhu.de](mailto:reichert@hhu.de)  
Twitter: @ReichertLab

**Kai Stühler**

Von: Kai Stühler <kai.stuehler@hhu.de>

Betreff: Aw: CDDIS-22-1280RR Initial Quality Check

Datum: 7. Oktober 2022 um 16:13:31 MESZ

An: Sebastian Wesselborg <sebastian.wesselborg@uni-duesseldorf.de>

Dear Sebastian,

**Herewith, I confirm that I fully comply with the changes made concerning the final author list.**

**Best regards  
Kai Stühler**

**Peter Proksch**

Betreff: Aw: URGENT !!! Wtr: CDDIS-22-1280RR Initial Quality Check

Datum: 9. Oktober 2022 um 07:35:57 MESZ

An: Sebastian Wesselborg <sebastian.wesselborg@uni-duesseldorf.de>

Dear Prof. Wesselborg,

I agree to all changes made during the revision of the manuscript incl. the addition of further authors.

With kind regards

Peter Proksch

**Björn Stork**

Von: Björn Stork <bjoern.stork@uni-duesseldorf.de>

Betreff: Aw: CDDIS-22-1280RR Initial Quality Check

Datum: 6. Oktober 2022 um 11:49:54 MESZ

An: Sebastian Wesselborg <sebastian.wesselborg@uni-duesseldorf.de>

Dear Sebastian,

I agree to the changes in the author list.

Best regards,

Björn Stork

---

Prof. Dr. rer. nat. Björn Stork  
Institute of Molecular Medicine I  
University Hospital Düsseldorf  
Universitätsstr. 1  
Building 23.12  
40225 Düsseldorf

Tel.: +49 (0)211 81-11954

E-mail: bjoern.stork@uni-duesseldorf.de
